# Supplementary material
Source: PubMed Central journal article supplement (PMC11029490)
Supplement: 262_2014_1613_MOESM1_ESM.pdf [file 262_2014_1613_MOESM1_ESM.pdf]

## Data Supplement 1

### Chemotherapy Regimens and Courses for Each Patient

|   | Regimens              |   | Regimens            |
|---|-----------------------|---|---------------------|
| A | CBDCA+GEM             | L | bevacizumab         |
| B | CBDCA+PTX             | M | VNR                 |
| C | DOC                   | N | intra-thoracic CDDP |
| D | CBDCA+PEM             | O | CBDCA+DOC           |
| E | PEM                   | P | CDDP+PEM            |
| F | CBDCA+PTX+bevacizumab |   |                     |
| G | CDDP+TS1(induction)   |   |                     |
| H | CDDP+VP16             |   |                     |
| J | CDDP+CPT11            |   |                     |
| K | CDDP+VNR              |   |                     |

CBDCA: carboplatin; GEM: gemcitabine; PTX: paclitaxel; DOC: docetaxel;  
 PEM: pemetrexed; CDDP: cisplatin; TS-1: tegafur gimeracil oteracil potassium;  
 VP16: etoposide; CPT11: irinotecan; VNR: vinorelbine.

#### Group A

| Patient No. | No of courses | Oral administration | Infusion |       |       |       |
|-------------|---------------|---------------------|----------|-------|-------|-------|
| A-001       | 3             |                     | B(X2)    | A     |       |       |
| A-002       | 11            | EGFR-TKI            | B(X3)    | A(X4) | D(x4) |       |
| A-003       | 4             |                     | A(X2)    | C(X2) |       |       |
| A-004       | 12            |                     | A(X2)    | C(X2) | B(X4) | J(X4) |
| A-005       | 16            |                     | H(X5)    | B(X2) | C(X5) | D(X4) |
| A-006       | 2             |                     | A(2)     |       |       |       |
| A-007       | 9             |                     | A(X2)    | C(X4) | J     | E(X2) |
| A-008       | 5             |                     | B        | A(X4) |       |       |
| A-009       | 12            |                     | A(X2)    | C(X2) | B(X4) | D(X4) |
| A-010       | 4             |                     | A(X4)    |       |       |       |
| A-011       | 12            |                     | A(X4)    | C(X2) | D(X3) | F(X3) |
| A-012       | 4             |                     | B(X2)    | A(X2) |       |       |
| A-013       | 6             |                     | A(X2)    | C(X2) | B(X2) |       |
| A-014       | 7             | EGFR-TKI            | A(X2)    | B(X2) | C(X3) |       |

|       |    |          |       |       |       |       |       |
|-------|----|----------|-------|-------|-------|-------|-------|
| A-015 | 0  |          |       |       |       |       |       |
| A-016 | 2  |          | A(X2) |       |       |       |       |
| A-017 | 11 |          | A(X2) | C(X2) | B(X2) | D(X5) |       |
| A-018 | 8  |          | A(X4) | D(X4) |       |       |       |
| A-019 | 4  |          | A(X4) |       |       |       |       |
| A-020 | 4  | ALK-TKI  | G(X2) | A(X2) |       |       |       |
| A-021 | 0  |          |       |       |       |       |       |
| A-022 | 7  |          | A(X4) | D(X3) |       |       |       |
| A-023 | 7  |          | G(X2) | A(X4) | D     |       |       |
| A-024 | 4  |          | A(X4) |       |       |       |       |
| A-025 | 4  |          | A(X4) |       |       |       |       |
| A-026 | 13 | EGFR-TKI | G     | A(X4) | C(X2) | D(X4) | F(X2) |
| A-027 | 4  |          | A(X4) |       |       |       |       |
| A-028 | 7  |          | N(X3) | A(X4) |       |       |       |
| A-029 | 13 |          | N(X5) | A(X4) | D(X4) |       |       |
| A-030 | 13 | TKI,TS1  | A(X2) | K(X4) | C(X2) | F(X2) | B(X3) |
| A-031 | 4  |          | A(X4) |       |       |       |       |
| A-032 | 4  |          | A(X4) |       |       |       |       |
| A-033 | 4  |          | A(X4) |       |       |       |       |
| A-034 | 4  |          | A(X4) |       |       |       |       |
| A-035 | 1  | UFT      | Q     |       |       |       |       |
| A-036 | 6  | EGFR-TKI | A(X4) | D(X2) |       |       |       |
| A-037 | 7  |          | A(X4) | F     | C(X2) |       |       |
| A-038 | 4  |          | A(X4) |       |       |       |       |
| A-040 | 10 |          | N(X5) | A(X2) | B(X3) |       |       |
| A-041 | 3  |          | A(X3) |       |       |       |       |
| A-042 | 4  |          | A(X4) |       |       |       |       |
| A-043 | 0  |          |       |       |       |       |       |
| A-044 | 4  |          | A(X4) |       |       |       |       |
| A-045 | 4  |          | A(X4) |       |       |       |       |
| A-046 | 4  |          | F(X4) |       |       |       |       |
| A-047 | 5  |          | F(X2) | B(X3) |       |       |       |
| A-048 | 4  |          | F(X4) |       |       |       |       |
| A-049 | 5  |          | B     | F(X4) |       |       |       |
| A-050 | 2  |          | A(2)  |       |       |       |       |
| A-051 | 3  |          | B     | F(X2) |       |       |       |

Mean number of courses 5.80 (SD: 3.83)  
 Total number of courses 290  
 min 0  
 max 16

A-039 was found to be ineligible after randomization and was excluded from the study.

Group B

| Patient No. | No of Courses | Oral administration | Infusion |       |       |       |       |       |
|-------------|---------------|---------------------|----------|-------|-------|-------|-------|-------|
| B-001       | 22            |                     | B(X2)    | C(X2) | D(X8) | E(X7) | D(X3) |       |
| B-002       | 4             |                     | B(X2)    | C(X2) |       |       |       |       |
| B-003       | 1             |                     | B        |       |       |       |       |       |
| B-004       | 4             |                     | B(X2)    | C(X2) |       |       |       |       |
| B-005       | 0             |                     |          |       |       |       |       |       |
| B-006       | 1             |                     | A        |       |       |       |       |       |
| B-007       | 3             |                     | N(X3)    |       |       |       |       |       |
| B-008       | 0             | UFT                 |          |       |       |       |       |       |
| B-009       | 0             |                     |          |       |       |       |       |       |
| B-010       | 5             |                     | A        | C(X4) |       |       |       |       |
| B-011       | 4             |                     | A(X4)    |       |       |       |       |       |
| B-012       | 5             | EGFR-TKI            | B(X4)    | B     |       |       |       |       |
| B-013       | 26            |                     | N(X3)    | A(X4) | K(X4) | F(X6) | L(X6) | E(X3) |
| B-014       | 0             |                     |          |       |       |       |       |       |
| B-015       | 4             | EGFR-TKI            | K(X4)    |       |       |       |       |       |
| B-016       | 4             |                     | A(X4)    |       |       |       |       |       |
| B-017       | 24            | EGFR-TKI            | A(X2)    | O(X4) | P(X4) | E(X5) | F(X4) | L(X5) |
| B-018       | 5             |                     | A(X4)    | E     |       |       |       |       |
| B-019       | 13            | EGFR-TKI            | A(X4)    | O(X5) |       | D(X4) |       |       |
| B-020       | 5             |                     | H(X5)    |       |       |       |       |       |
| B-021       | 6             |                     | N(X3)    | A(X2) |       | C     |       |       |
| B-022       | 0             |                     |          |       |       |       |       |       |
| B-023       | 8             |                     | A(X4)    | F(X4) |       |       |       |       |
| B-024       | 8             |                     | A(X4)    | B(X4) |       |       |       |       |
| B-025       | 6             | EGFR-TKI            | G(X2)    | A(X4) |       |       |       |       |

|       |    |          |         |       |       |       |        |       |
|-------|----|----------|---------|-------|-------|-------|--------|-------|
| B-026 | 4  | EGFR-TKI | K(X4)   |       |       |       |        |       |
| B-027 | 28 |          | O K(X2) | A(X4) |       | F(X4) | L(X13) | F(X4) |
| B-028 | 1  |          | N       |       |       |       |        |       |
| B-029 | 7  |          | A(X4)   | O(X2) |       | C     |        |       |
| B-030 | 2  |          | A(X2)   |       |       |       |        |       |
| B-031 | 4  |          | A(X4)   |       |       |       |        |       |
| B-032 | 12 |          | A(X4)   | D(X4) |       | F(X4) |        |       |
| B-033 | 13 |          | A(X2)   | K(X5) |       | F(X3) | E(X3)  |       |
| B-034 | 4  | TS1      | G(X4)   |       |       |       |        |       |
| B-035 | 20 | EGFR-TKI | A(X2)   | D(X6) | E(X4) | K     | F(X3)  | L(X4) |
| B-036 | 9  |          | N(X2)   | F(X7) |       |       |        |       |
| B-037 | 1  |          | F       |       |       |       |        |       |
| B-038 | 4  |          | A(X4)   |       |       |       |        |       |
| B-039 | 7  |          | A(X7)   |       |       |       |        |       |
| B-040 | 5  |          | G       | A(X2) |       | C(X2) |        |       |
| B-041 | 0  |          |         |       |       |       |        |       |
| B-042 | 4  |          | B(X4)   |       |       |       |        |       |
| B-043 | 6  |          | A(X4)   | C(X2) |       |       |        |       |
| B-044 | 4  |          | A(X4)   |       |       |       |        |       |
| B-045 | 4  | TS1      | K(X4)   |       |       |       |        |       |
| B-046 | 5  |          | G(X2)   | A(X3) |       |       |        |       |
| B-047 | 7  |          | B(X6)   | C     |       |       |        |       |
| B-048 | 5  |          | F(X2)   | B     |       | F(X2) |        |       |
| B-049 | 6  |          | A(X6)   |       |       |       |        |       |
| B-050 | 3  |          | A       | F(X2) |       |       |        |       |
| B-052 | 4  |          | A(X4)   |       |       |       |        |       |

Mean number of courses 6.41 (SD:6.65)

Total number of courses 327

min 0

max 28

Oral administration is not included in the calculation of the courses.

B-051 was found to be ineligible after randomization and was excluded from the study.

## Data Supplement 2

### Immunotherapy

| Patient No. | Courses | Transferred Cell Numbers (X10 <sup>9</sup> ) |       | Adverse Effects   |            | Recurrence |
|-------------|---------|----------------------------------------------|-------|-------------------|------------|------------|
|             |         | Mean / Course                                | Total | Chills, Shivering | Fever >38° |            |
| A-001       | 3       | 7.1                                          | 21.3  | 0                 | 0          | yes        |
| A-002       | 36      | 9.1                                          | 327.6 | 3                 | 6          | yes        |
| A-003       | 13      | 9.3                                          | 120.9 | 0                 | 0          | no         |
| A-004       | 20      | 9.6                                          | 192   | 1                 | 0          | yes        |
| A-005       | 30      | 9.7                                          | 291   | 1                 | 6          | no         |
| A-006       | 14      | 10.4                                         | 145.6 | 0                 | 0          | no         |
| A-007       | 17      | 9.2                                          | 156.4 | 1                 | 1          | yes        |
| A-008       | 14      | 9.1                                          | 127.4 | 0                 | 0          | no         |
| A-009       | 31      | 10.9                                         | 348.9 | 4                 | 0          | yes        |
| A-010       | 16      | 9.3                                          | 148.8 | 3                 | 3          | no         |
| A-011       | 31      | 9.8                                          | 303.8 | 0                 | 0          | yes        |
| A-012       | 18      | 9.5                                          | 171   | 3                 | 4          | no         |
| A-013       | 16      | 8.8                                          | 140.8 | 0                 | 0          | yes        |
| A-014       | 24      | 10.3                                         | 247.2 | 9                 | 2          | yes        |
| A-015       | 14      | 11.5                                         | 161   | 0                 | 6          | no         |
| A-016       | 14      | 5.6                                          | 78.4  | 0                 | 0          | no         |
| A-017       | 24      | 6.6                                          | 158.4 | 0                 | 0          | yes        |
| A-018       | 12      | 5.7                                          | 67.9  | 3                 | 3          | yes        |
| A-019       | 16      | 8.8                                          | 140.8 | 4                 | 1          | no         |
| A-020       | 14      | 8.9                                          | 124.6 | 2                 | 0          | yes        |
| A-021       | 10      | 6.5                                          | 65    | 0                 | 0          | yes        |
| A-022       | 18      | 7.4                                          | 133.2 | 1                 | 1          | no         |
| A-023       | 25      | 7.5                                          | 187.5 | 0                 | 0          | no         |
| A-024       | 14      | 7.8                                          | 109.2 | 0                 | 0          | no         |
| A-025       | 14      | 5.7                                          | 79.8  | 0                 | 0          | no         |
| A-026       | 22      | 10                                           | 220   | 1                 | 1          | yes        |
| A-027       | 13      | 10.3                                         | 133.9 | 0                 | 0          | no         |

|       |      |      |       |   |   |     |
|-------|------|------|-------|---|---|-----|
| A-028 | 19   | 9.2  | 174.8 | 6 | 4 | no  |
| A-029 | 16   | 6.9  | 110.4 | 2 | 2 | no  |
| A-030 | 15   | 7    | 104.7 | 0 | 0 | yes |
| A-031 | 13   | 7.1  | 92.3  | 0 | 0 | no  |
| A-032 | 12   | 8.2  | 98.4  | 0 | 0 | no  |
| A-033 | 13   | 12.7 | 165.1 | 0 | 0 | no  |
| A-034 | 13   | 10.1 | 131.3 | 0 | 0 | yes |
| A-035 | 18   | 13   | 234   | 2 | 2 | yes |
| A-036 | 14   | 10.2 | 142.8 | 1 | 0 | no  |
| A-037 | 14   | 11.5 | 161   | 1 | 1 | yes |
| A-038 | 14   | 11.2 | 156.8 | 0 | 0 | no  |
| A-040 | 14   | 12.3 | 172.2 | 1 | 1 | no  |
| A-041 | 5    | 10   | 50    | 2 | 1 | no  |
| A-042 | 13   | 13.6 | 176.8 | 1 | 2 | no  |
| A-043 | 6    | 7.9  | 47.4  | 0 | 0 | no  |
| A-044 | 12   | 12.2 | 146.4 | 0 | 0 | no  |
| A-045 | 9    | 12.2 | 109.4 | 0 | 0 | yes |
| A-046 | 11   | 17.7 | 194.7 | 0 | 0 | no  |
| A-047 | 11   | 15.3 | 168.3 | 0 | 0 | no  |
| A-048 | 10   | 16.3 | 163   | 0 | 0 | no  |
| A-049 | 9    | 19.4 | 174.6 | 0 | 0 | yes |
| A-050 | 8    | 15.4 | 123.2 | 0 | 0 | no  |
| A-051 | 1    | 16   | 16    | 0 | 0 | no  |
| Mean  | 15.3 | 10.2 | 151.6 |   |   |     |
| SD    | 6.92 | 3.13 | 68.11 |   |   |     |
| Max   | 36   | 15.1 | 327.6 |   |   |     |
| Min   | 1    | 5.6  | 21.3  |   |   |     |

|                                             |                            |
|---------------------------------------------|----------------------------|
| Mean total of courses transferred / patient | 15.3±6.92                  |
| Mean cell number transferred /course        | 10.2±3.13X10 <sup>9</sup>  |
| Mean total cell number / patient            | 151.6±68.1X10 <sup>9</sup> |
| Total number of courses                     | 762                        |
| Chills, shivering                           | 52 (6.8%)                  |
| Fever                                       | 47 (6.2%)                  |
